# Supplementary material for: Amide bond hydrolysis in peptides and cyclic peptides catalyzed by a dimeric Zr(iv)-substituted Keggin type polyoxometalate
Source: Royal Society of Chemistry journal article supplement (doi:10.1039/c3dt50705j), 2013-01-01
Supplement: c3dt50705j.pdf [file c3dt50705j.pdf]

## Supporting Information

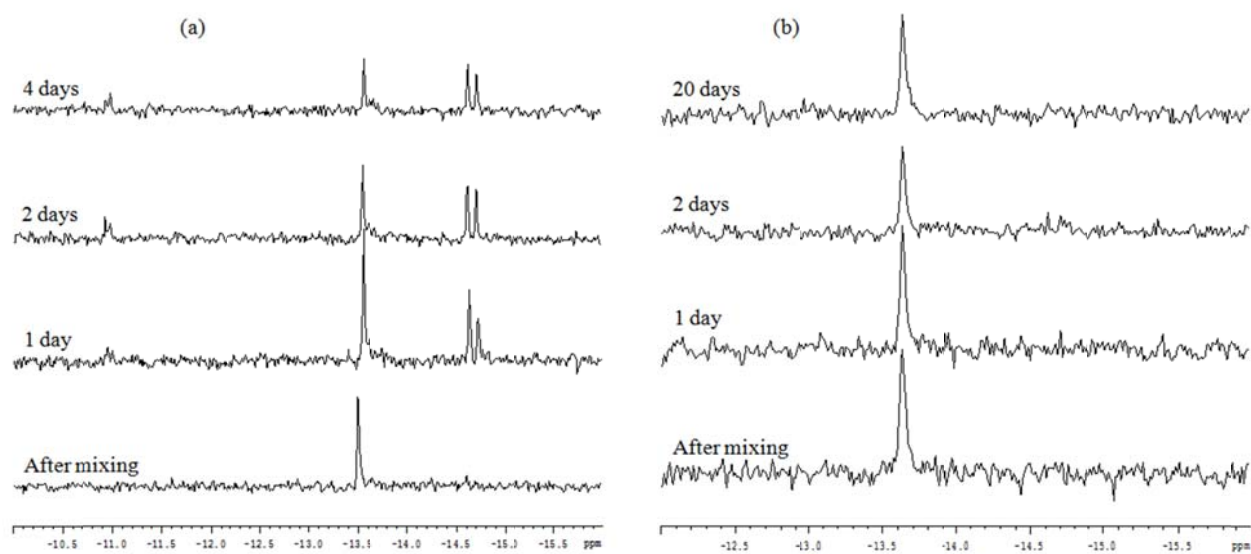

**Figure S1.**  $^{31}\text{P}$  NMR spectra of 2 mM solution of **1** at 60 °C and (a) pD 7.4 and (b) pD 5.4.

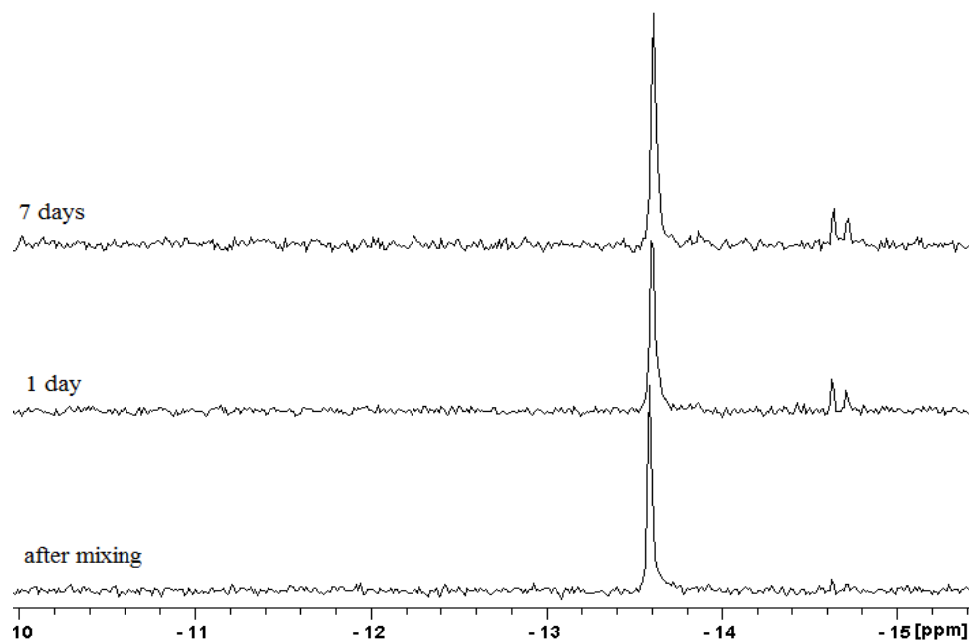

**Figure S2.**  $^{31}\text{P}$  NMR spectra of 6.0 mM **1** at 60 °C and pD 5.4, measured after mixing, after 1 day and 7 days.

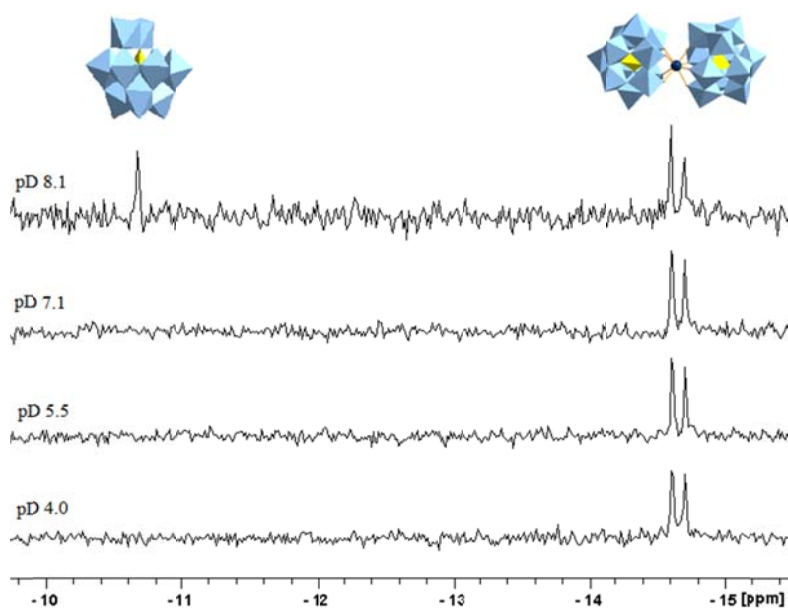

**Figure S3.**  $^{31}\text{P}$  NMR spectra of 2.0 mM solution of **2** at different pD values.

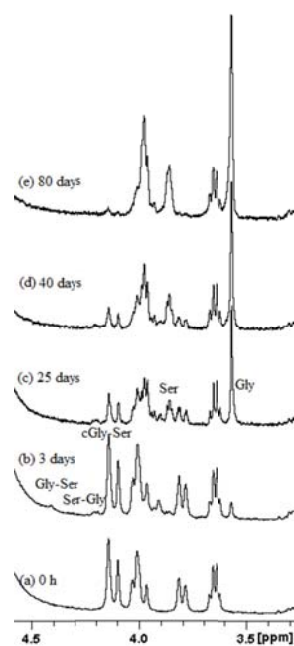

**Figure S4.**  $^1\text{H}$  NMR spectra recorded at different reaction times during the hydrolysis of 2.0 mM cGly-Ser by 2.0 mM **1** at pD 5.4 and 60 °C.

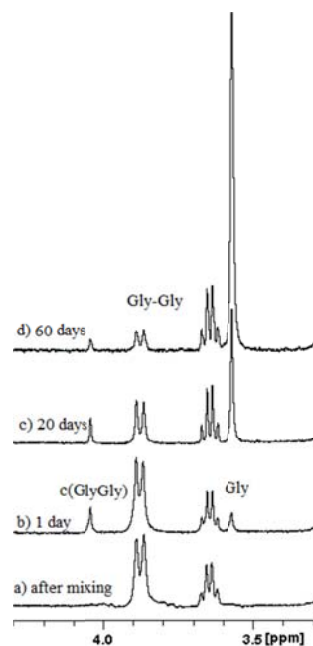

**Figure S5.**  $^1\text{H}$  NMR spectra recorded at different reaction times during the hydrolysis of 2.0 mM Gly-Gly by 2.0 mM **1** at pH 5.4 and 60 °C.

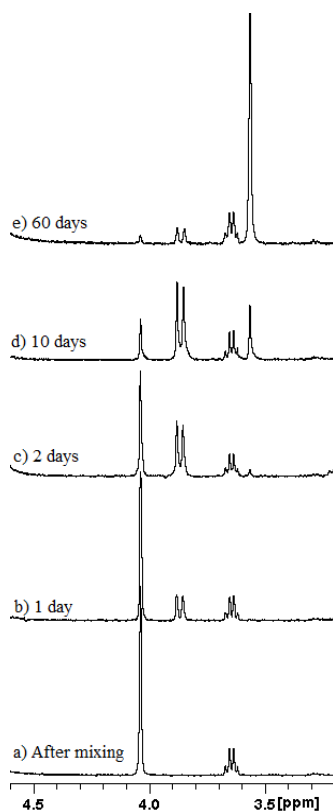

**Figure S6**  $^1\text{H}$  NMR spectra recorded at different reaction times during the hydrolysis of 2.0 mM cGly-Gly by 2.0 mM **1** at pH 5.4 and 60 °C.

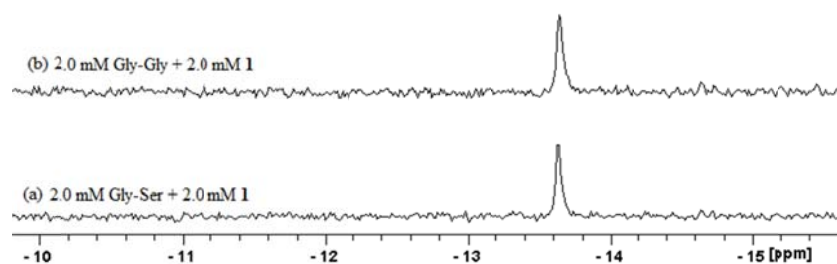

**Figure S7.**  $^{31}\text{P}$  NMR spectra of 2.0 mM **1** in the presence of the dipeptide at pD 5.4 and 60 °C recorded after 7 days (a) and after 2 months (b).

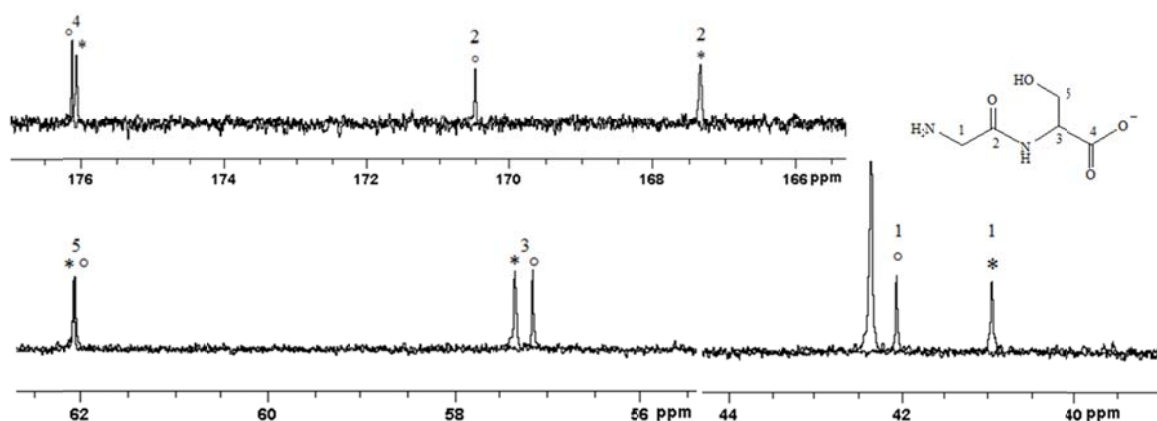

**Figure S8.**  $^{13}\text{C}$  NMR spectra of Gly-Ser in the presence (\*) and absence (°) of **1** at pD 9.0 (The signal at 42.4 ppm belongs to the  $\text{CH}_2$  carbon of the ethyl group of the diethyl ammonium counter ions of **1**).

**Table S1.**  $^{13}\text{C}$  NMR chemical shift values (ppm) of 20.0 mM Gly-Gly in the presence and in the absence of 5.0 mM **1**.

| $^{13}\text{C}$ NMR | pD 6.4  |                    |                      | pD 9.0  |                    |                      |
|---------------------|---------|--------------------|----------------------|---------|--------------------|----------------------|
|                     | Gly-Gly | Gly-Gly + <b>1</b> | $\Delta\delta$ (ppm) | Gly-Gly | Gly-Gly + <b>1</b> | $\Delta\delta$ (ppm) |
| $\delta_1$          | 40.72   | 40.62              | 0.10                 | 42.47   | 40.99              | 1.48                 |
| $\delta_2$          | 167.40  | 167.06             | 0.34                 | 171.87  | 167.90             | 3.97                 |
| $\delta_3$          | 43.27   | 43.29              | 0.02                 | 43.16   | 43.32              | 0.16                 |
| $\delta_4$          | 176.49  | 176.48             | 0.01                 | 176.63  | 176.55             | 0.08                 |

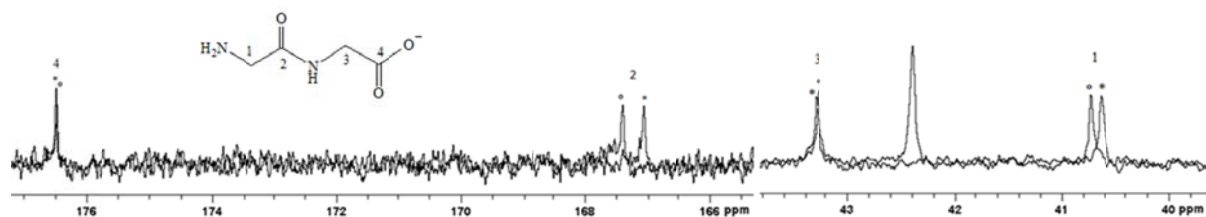

**Figure S9.** <sup>13</sup>C NMR spectra of Gly-Gly in the presence (\*) and absence (°) of **1** at pD 6.4 (The signal at 42.4 ppm belongs to the CH<sub>2</sub> carbon of the ethyl group of the diethyl ammonium counter ions of **1**).

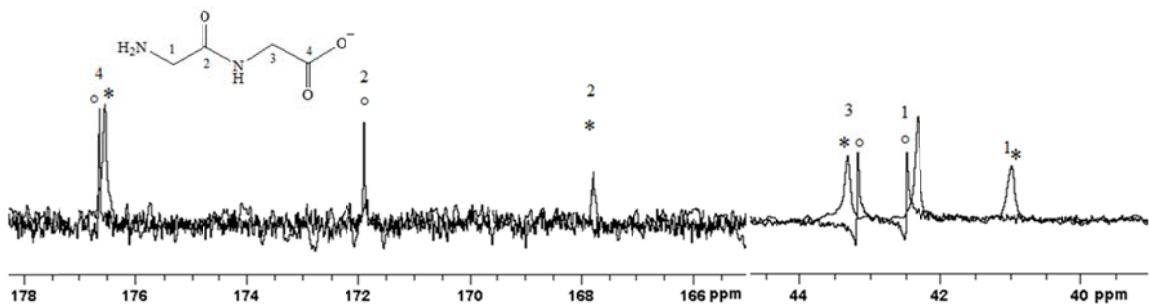

**Figure S10.** <sup>13</sup>C NMR spectra of Gly-Gly in the presence (\*) and absence (°) of **1** at pD 9.0. (The signal at 42.4 ppm belongs to the CH<sub>2</sub> carbon of the ethyl group of the diethyl ammonium counter ions of **1**).

**Table S2.** Influence of pD on k<sub>obs</sub> for the hydrolysis of 2.0 mM Gly-Ser in the absence and in the presence of 2.0 mM **1** at pD range 3.6 – 8.4 and 60 °C.

| pD  | 10 <sup>7</sup> x k <sub>obs</sub> (s <sup>-1</sup> ) |                    |       |
|-----|-------------------------------------------------------|--------------------|-------|
|     | Gly-Ser                                               | Gly-Ser + <b>1</b> | Δ     |
| 8.4 | 0.83                                                  | 30.77              | 29.94 |
| 7.4 | 1.94                                                  | 34.67              | 32.73 |
| 6.4 | 1.39                                                  | 47.23              | 45.84 |
| 5.4 | 1.39                                                  | 63.33              | 61.94 |
| 4.5 | 0.56                                                  | 44.21              | 43.65 |
| 3.6 | 0.28                                                  | 29.43              | 29.15 |

**Table S3.** Observed rate constants for the hydrolysis of 2.0 mM Gly-Ser or 2.0 mM Gly-Gly by different metal-based catalysts.

| Catalyst                                          | Experimental conditions | $k_{\text{obs}} \text{ (s}^{-1}\text{)}$ |                        | Ref       |
|---------------------------------------------------|-------------------------|------------------------------------------|------------------------|-----------|
|                                                   |                         | Gly-Ser                                  | Gly-Gly                |           |
| ZnCl <sub>2</sub> (10.0 mM)                       | pH 7, 70 °C             | $205.1 \times 10^{-7a}$                  | $7.16 \times 10^{-7a}$ | [14b]     |
| Na <sub>2</sub> MoO <sub>4</sub> (120.0 mM)       | pH 7.0, 60 °C           | $59 \times 10^{-7}$                      |                        | [28a]     |
| Zr(IV)/4, 13-Diaza-18-crown-6 (10.0 mM)           | pH 7.0, 60 °C           | $294.5 \times 10^{-7}$                   | $319.8 \times 10^{-7}$ | [15]      |
| Cu(II)-cis,cis-1,3,5-triaminocyclohexane (2.0 mM) | pH 8.1, 70 °C           | $255.5 \times 10^{-7}$                   | $11.39 \times 10^{-7}$ | [18c]     |
| Zr-Wells Dawson POM (2.0 mM)                      | pH 4.6, 60 °C           | $34.0 \times 10^{-7}$                    | $15.8 \times 10^{-7}$  | [12a]     |
| Zr-Keggin POM (2.0 mM)                            | pH 5.0, 60 °C           | $63.33 \times 10^{-7}$                   | $4.44 \times 10^{-7}$  | This work |

<sup>a</sup>[dipeptide] = 10.0 mM

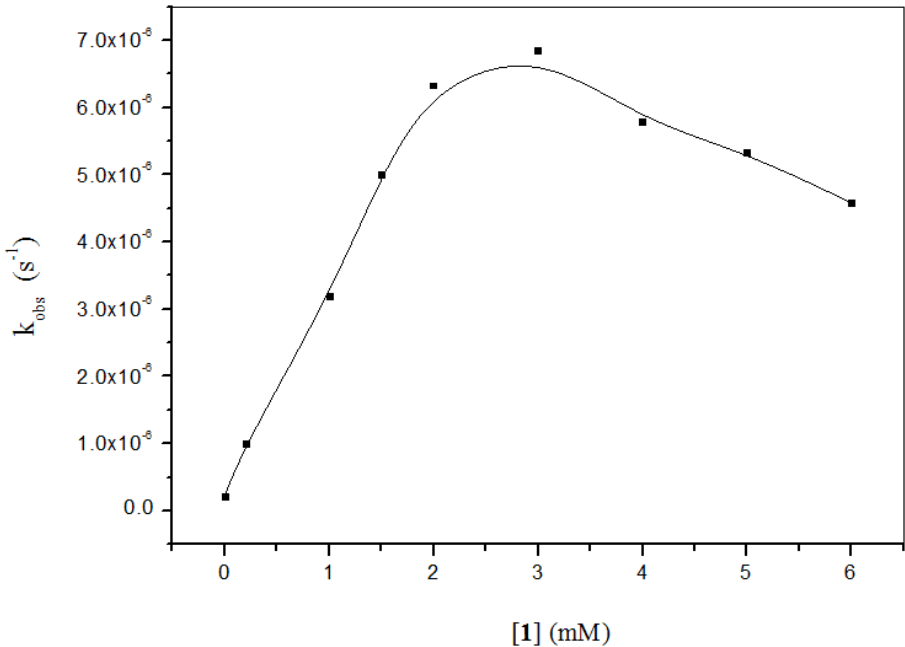

**Figure S11.** Influence of the concentration of **1** on the observed rate constant for the hydrolysis of 2.0 mM Gly-Ser at pH 5.4 and 60 °C.

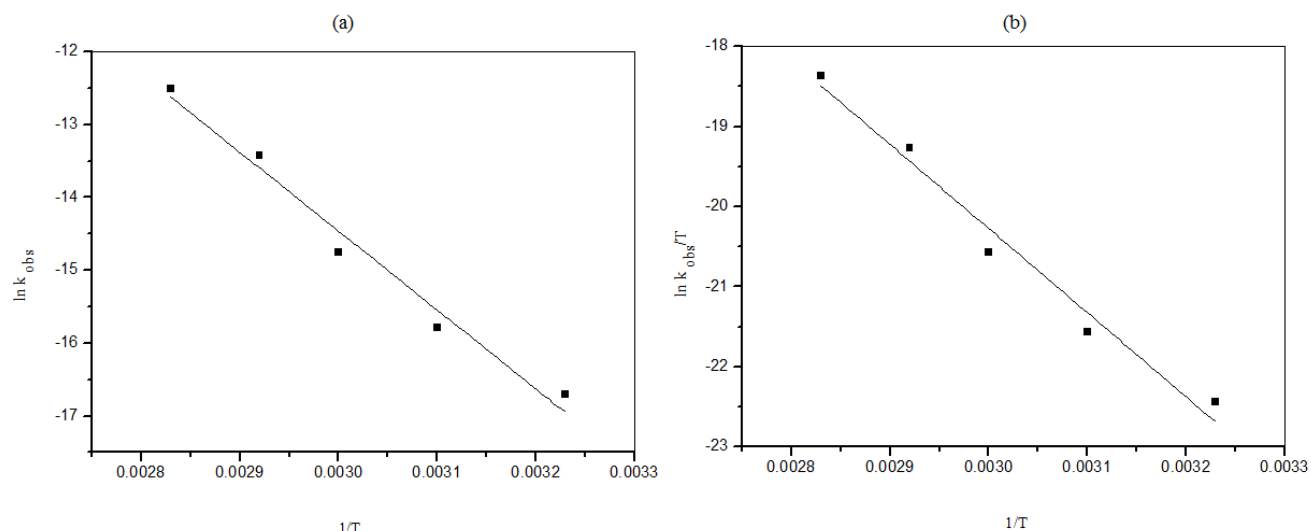

**Figure S12.** (a) Arrhenius plot of  $\ln(k_{\text{obs}})$  as a function of  $1/T$  and (b) Eyring plot of  $\ln(k_{\text{obs}}/T)$  as a function of  $1/T$  for the cleavage of 2.0 mM Gly-Gly by **1** at pD 5.4.

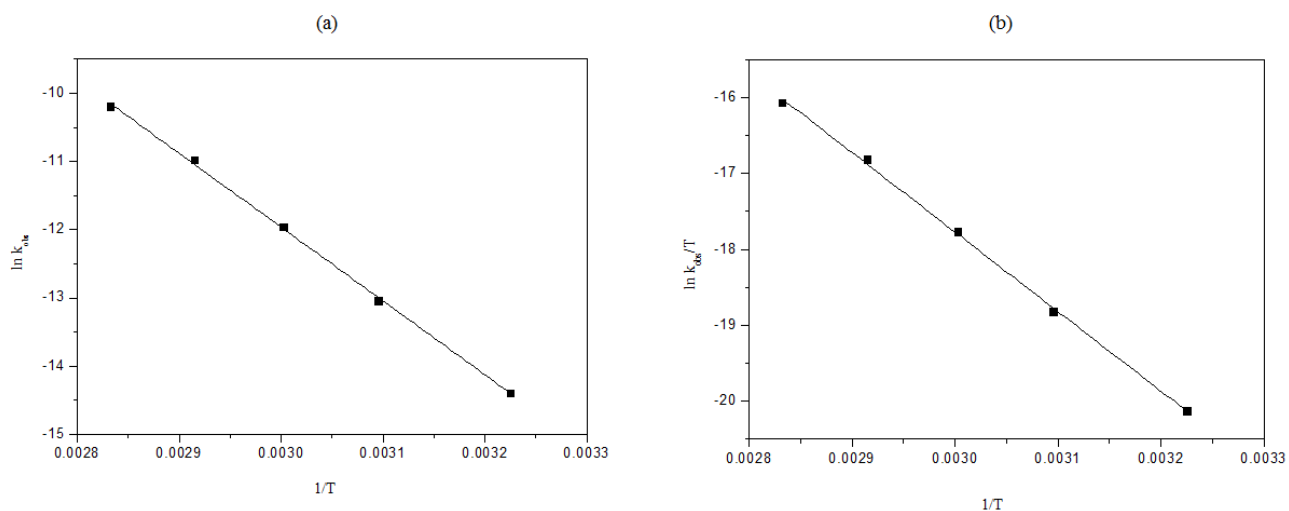

**Figure S13.** (a) Arrhenius plot of  $\ln(k_{\text{obs}})$  as a function of  $1/T$  and (b) Eyring plot of  $\ln(k_{\text{obs}}/T)$  as a function of  $1/T$  for the cleavage of 2.0 mM Gly-Ser by **1** at pD 5.4.

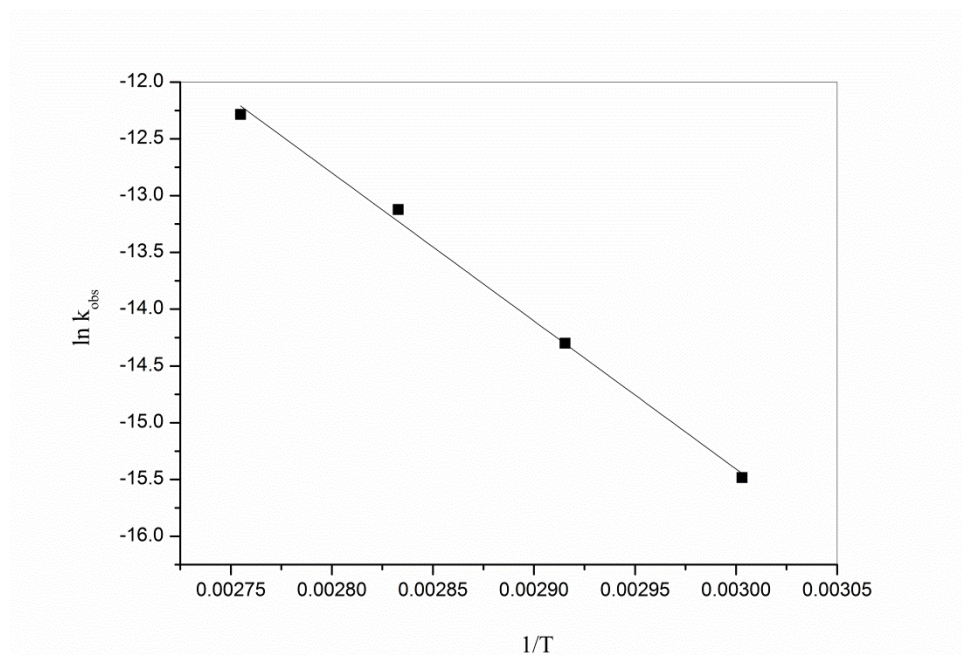

**Figure S14.** Arrhenius plot of  $\ln(k_{\text{obs}})$  as a function of  $1/T$  for the cleavage of 2.0 mM Gly-Ser in the absence of **1** at pD 5.4.

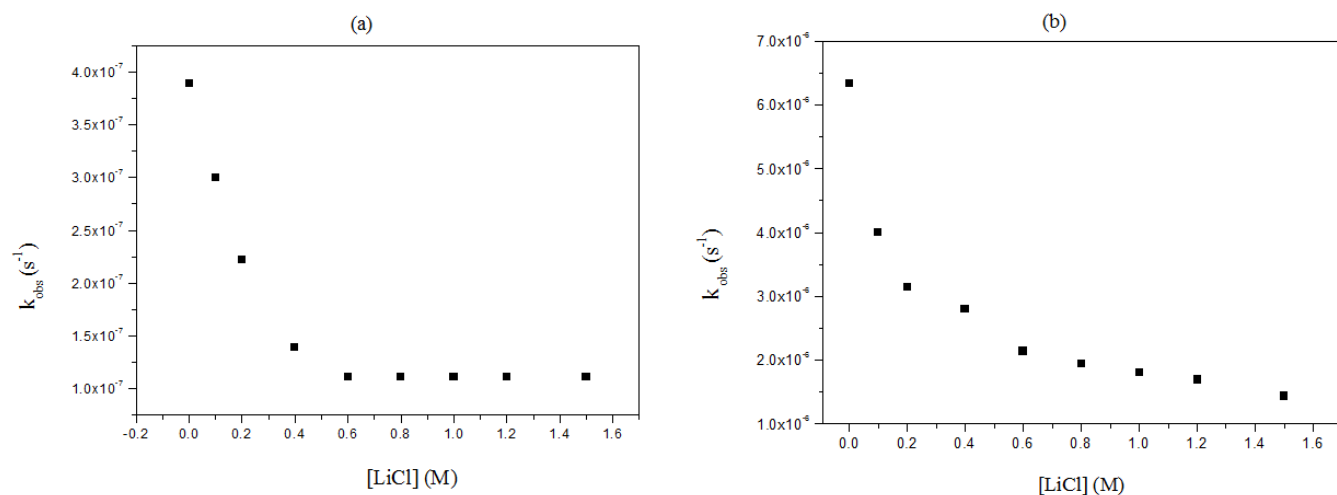

**Figure S15.** Salt effect on the rate constant of the hydrolysis of (a) 2.0 mM Gly-Gly and (b) 2.0 mM Gly-Ser in the presence of 2.0 mM **1** at pD 5.4 and 60 °C.

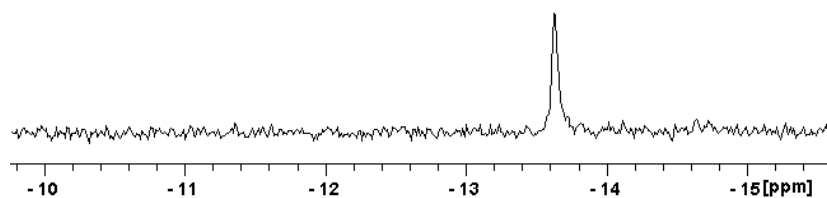

**Figure S16.** <sup>31</sup>P NMR spectrum of 2.0 mM **1** in the presence of 2.0 mM Gly-Ser and 1.0 M LiCl at pD 5.4 and 60 °C after 5 days.

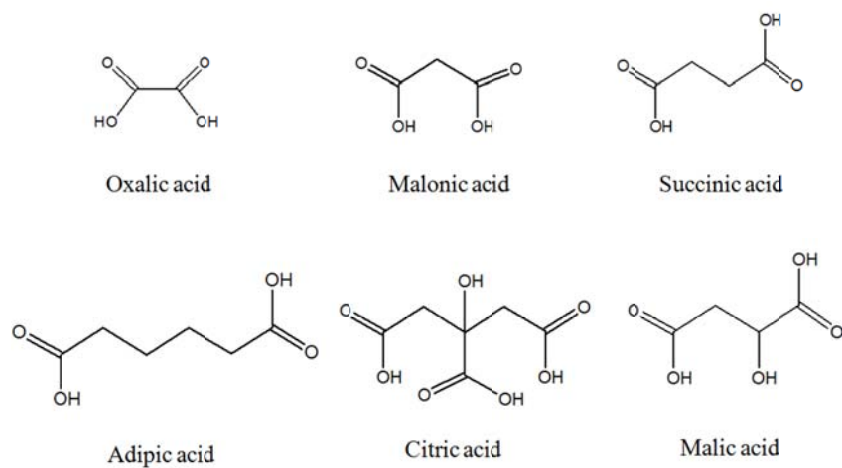

**Figure S17.** Chemical structures of the examined inhibitors.
